# Supplementary material for: Comparison of Different Commercial Conducting Materials as Ion-to-Electron Transducer Layers in Low-Cost Selective Solid-Contact Electrodes
Source: MDPI journal article supplement (doi:10.3390/s20051348), 2020-02-29
Supplement: s1 [file s1]

## Supplementary Information

The supporting information contains tables to give more information and details about the work.

**Table S1.** Protocol to prepare and deposit the conducting materials.

| Polymer/ink        | Agitation<br>(min) | Sonication<br>(min) | Films* <sup>1</sup> | T<br>(°C)* <sup>2</sup> |
|--------------------|--------------------|---------------------|---------------------|-------------------------|
| Graphene/PEDOT:PSS | 35                 | -                   | 3                   | 90                      |
| PPy-PCaprol        | 30                 | 60                  | 2                   | 35                      |
| Meth-PEDOT         | 20                 | 30                  | 3                   | 35                      |
| PEDOT:PEG          | 30                 | 30                  | 2                   | 45                      |
| PEDOT:PSS hc       | 20                 | -                   | 2                   | 95                      |

\*<sup>1</sup> Each film correspond to one drop of 2.5  $\mu$ L of the polymer material.

\*<sup>2</sup> Temperature to increase the evaporation rate of the solvent.

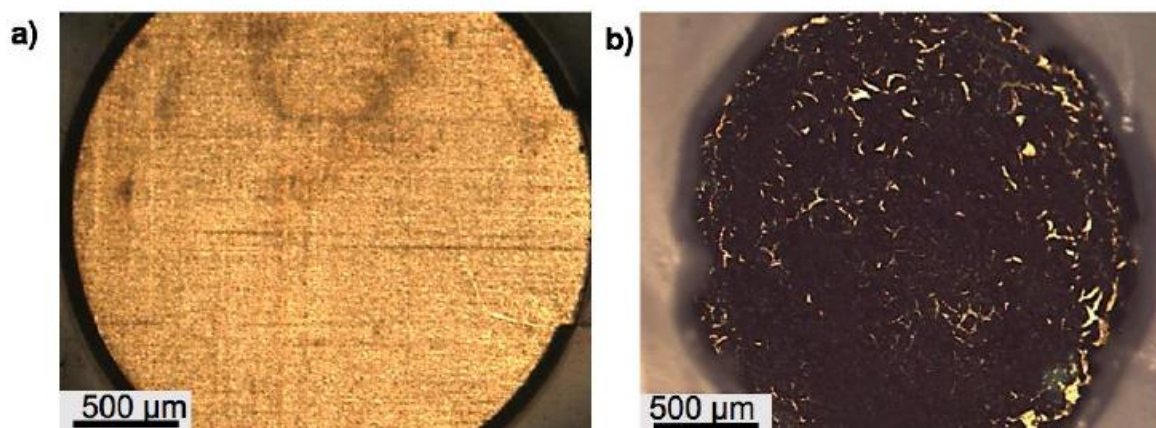

**Figure S1.** Optical images of: a) Bare electrode and b) PEDOT:PEG modified electrode.
